# Supplementary material
Source: PubMed Central journal article supplement (PMC3414598)
Supplement: supp_111045_predict-forsyth-3-at.pdf [file supp_111045_predict-forsyth-3-at.pdf]

### Appendix 3: Resources for clinicians, patients and families

- An authoritative database of the evidence base for cognitive rehabilitation interventions (largely confined to adult practice at present) ([www.psycbite.com](http://www.psycbite.com))
- Resources for training in emotional and social competence ([www.bianys.org/learnnet](http://www.bianys.org/learnnet))
- Family support
  - All ages
    - Brain Injury Association of Canada (<http://biac-aclc.ca/en/>)
    - Brain Injury Association of America ([www.biausa.org](http://www.biausa.org))
    - Headway UK ([www.headway.org.uk](http://www.headway.org.uk))
    - Stroke Association UK ([www.stroke.org.uk](http://www.stroke.org.uk))
    - American Stroke Association ([www.strokeassociation.org](http://www.strokeassociation.org))
    - Heart and Stroke Foundation ([www.heartandstroke.ca](http://www.heartandstroke.ca))
  - Pediatric
    - Child Brain Injury Trust UK ([www.cbituk.org](http://www.cbituk.org))
    - Children's Hemiplegia and Stroke Association ([www.chasa.org](http://www.chasa.org))
    - Hemihelp ([www.hemihelp.org.uk](http://www.hemihelp.org.uk))
- Professional Associations
  - International Brain Injury Association ([www.internationalbrain.org](http://www.internationalbrain.org))
  - International Paediatric Brain Injury Society ([www.ipbis.org](http://www.ipbis.org))
